# Supplementary material for: Characterisation of ethnic differences in DNA methylation between UK-resident South Asians and Europeans
Source: PubMed Central journal article supplement (PMC9571473; doi:10.1186/s13148-022-01351-2), 2022-10-15

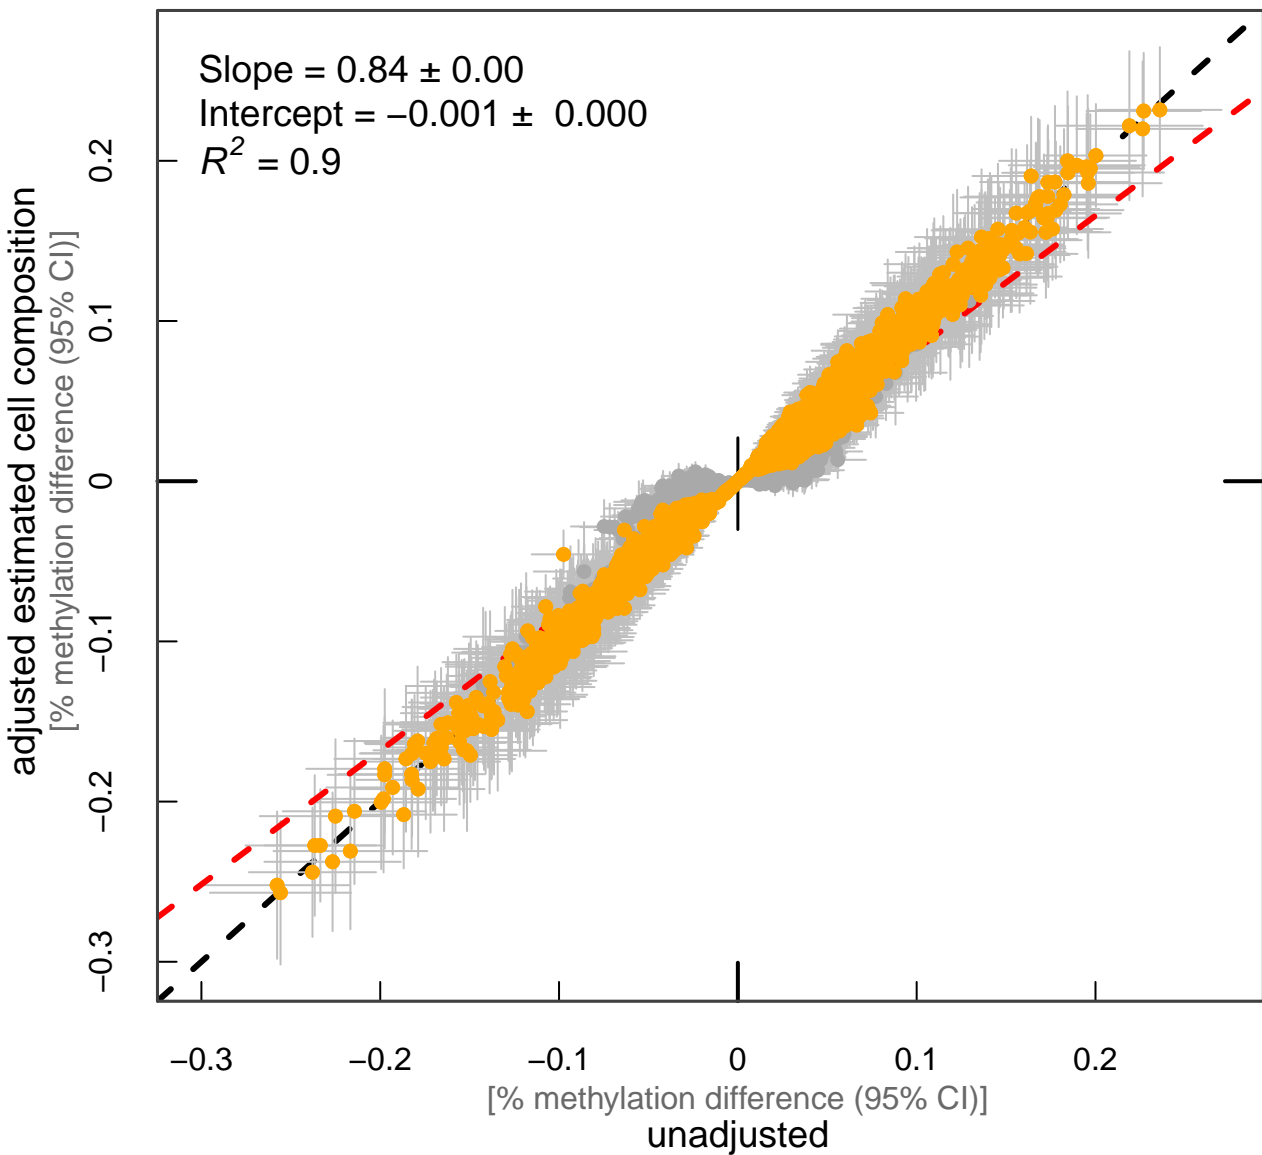

Supplement: 13148_2022_1351_MOESM5_ESM.pdf [file 13148_2022_1351_MOESM5_ESM.pdf]
