# Supplementary material for: Characterisation of ethnic differences in DNA methylation between UK-resident South Asians and Europeans
Source: Clin Epigenetics. 2022 Oct 15;14:130. doi: 10.1186/s13148-022-01351-2 (PMC9571473; doi:10.1186/s13148-022-01351-2)

SABRE Principal Components 1 and 2: top 1000 probes ranked by variance

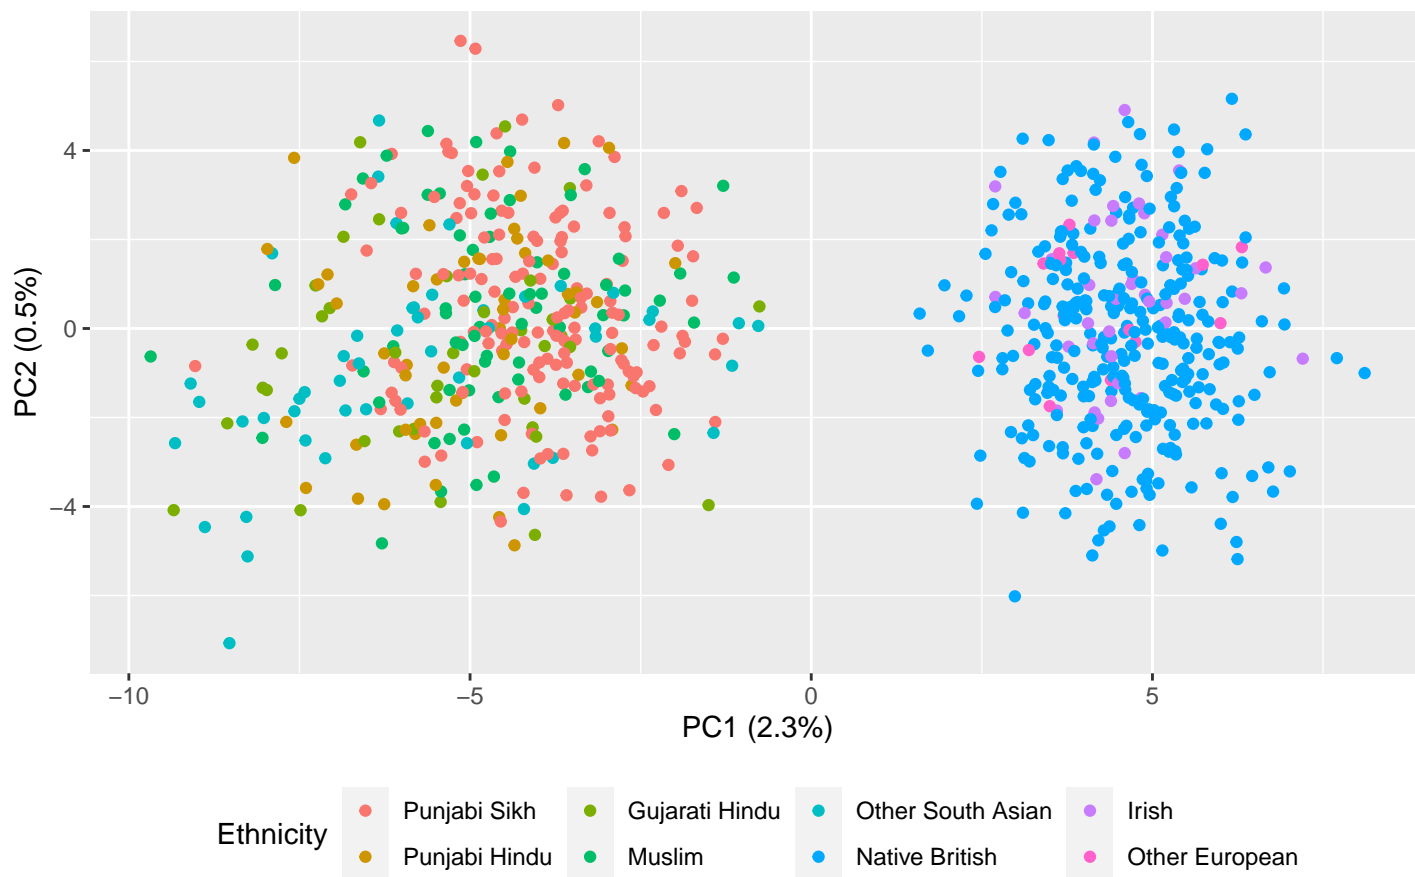

BiB Principal Components 1 and 2: top 1000 probes ranked by variance

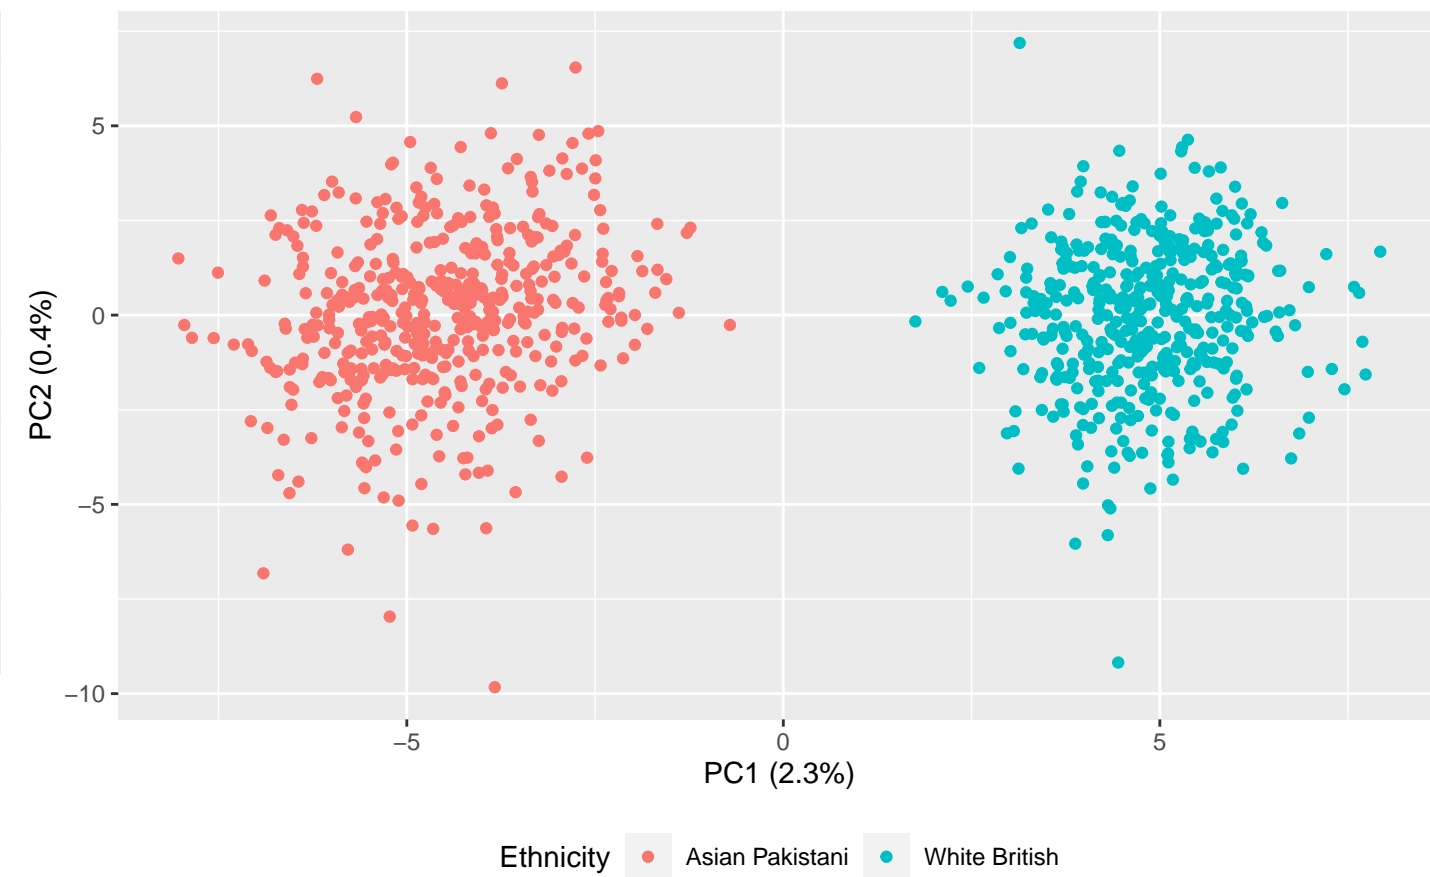

SABRE Principal Components 1 and 2: top 10000 probes ranked by variance

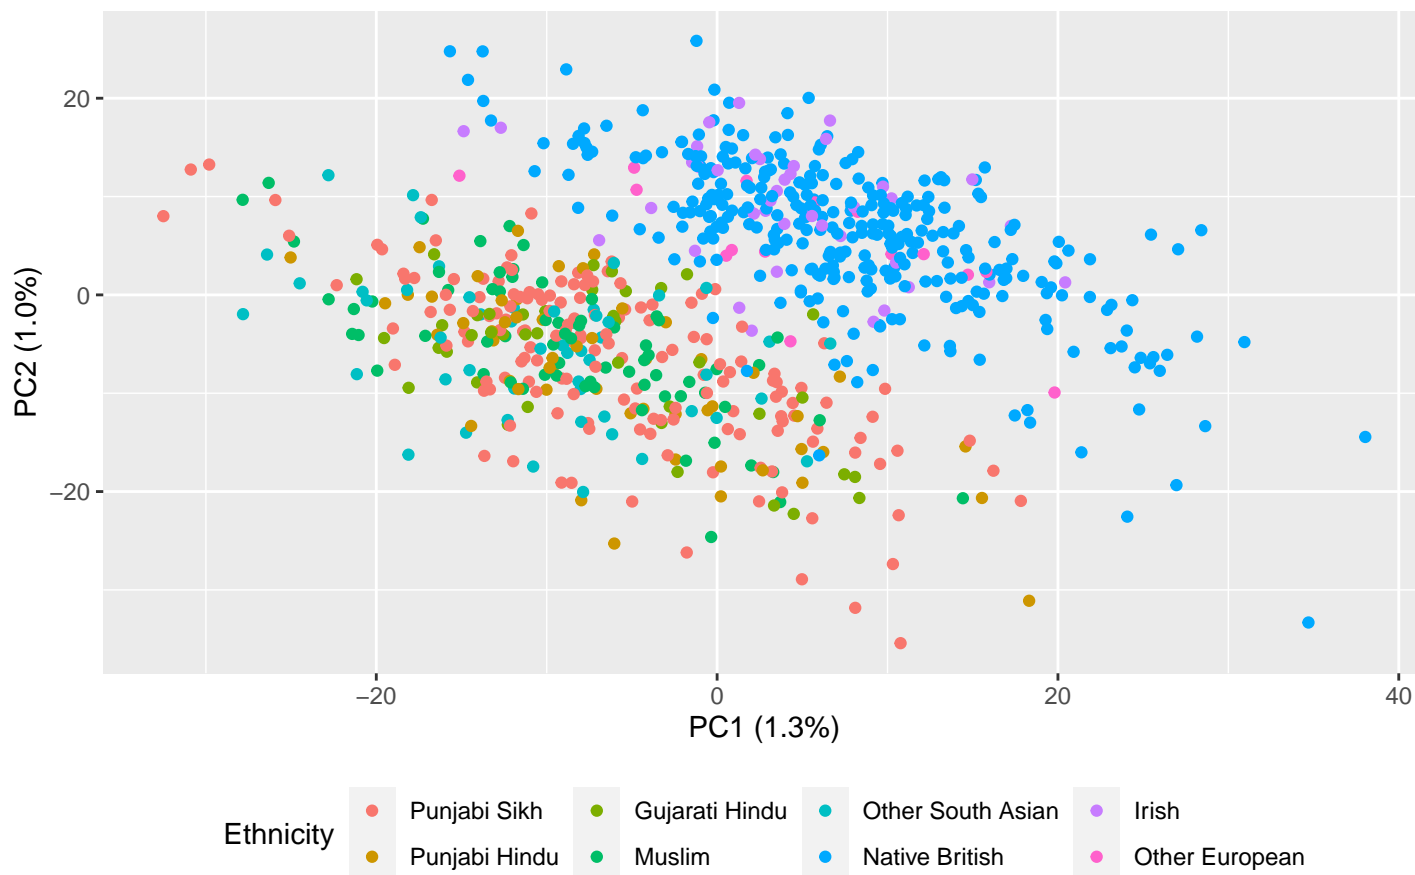

BiB Principal Components 1 and 2: top 10000 probes ranked by variance

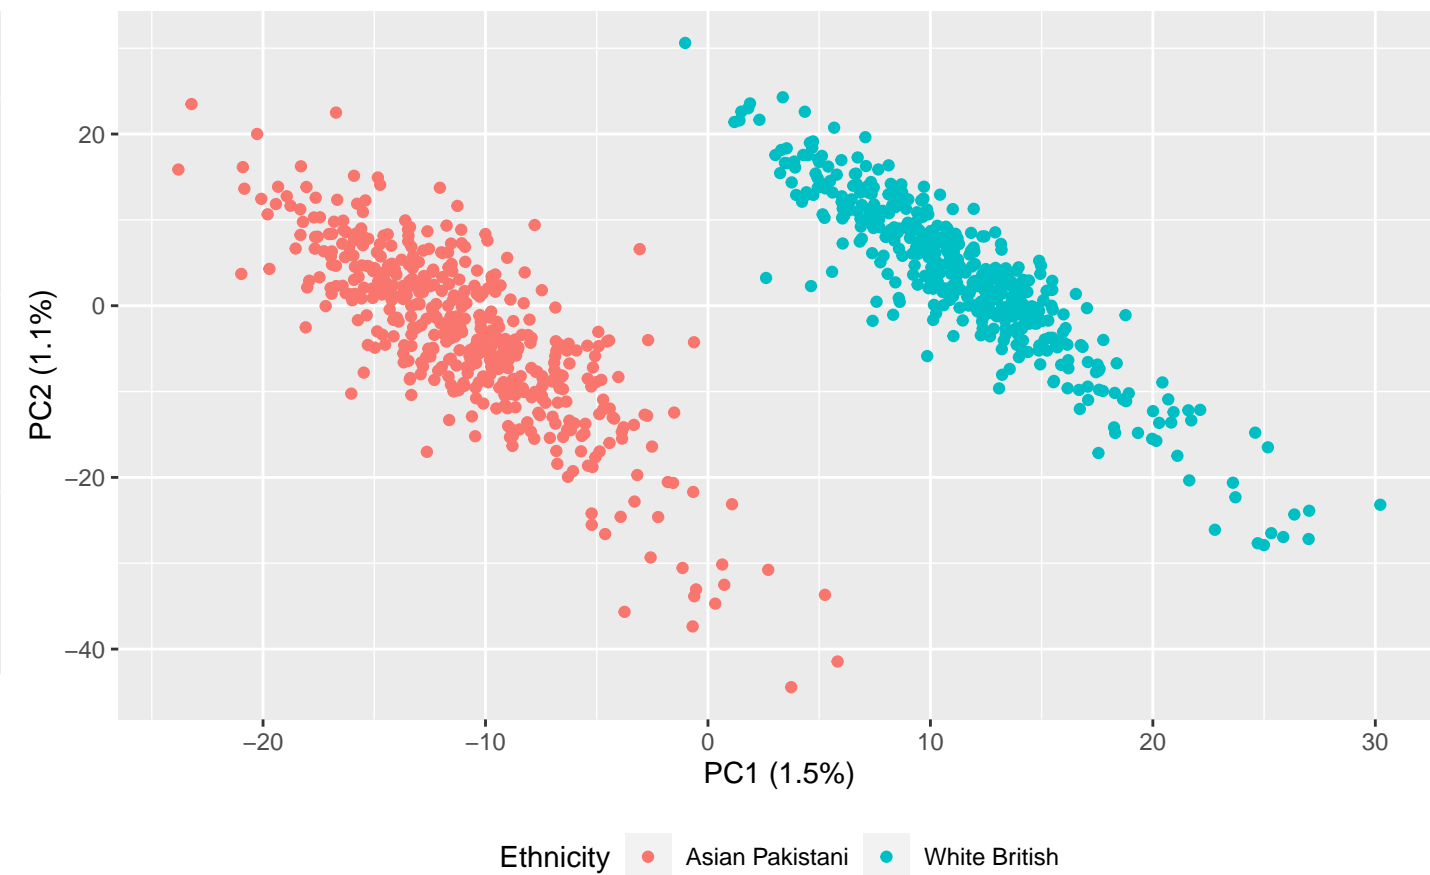

Supplement: Supplementary file 2 — Additional file 2. Figure S2. Principal component analysis of SABRE DNA methylation data. The upper panel shows PCs 1 and 2 generated from the 1000 most variant probes in SABRE or BiB. The lower panel shows PCs 1 and 2 generated from the 10000 most variant probes in SABRE or BiB. Colours indicate self-reported ethnic subgrouping (SABRE, BiB). Axis labels show the variance explained by each PC. [file 13148_2022_1351_MOESM2_ESM.pdf]
